# Supplementary material for: The Histone H3 Lysine 9 Methyltransferase DIM-5 Modifies Chromatin at frequency and Represses Light-Activated Gene Expression
Source: PubMed Central journal article supplement (PMC4291474; doi:10.1534/g3.114.015446), 2014-11-25
Supplement: supp_g3.114.015446_FigureS4.pdf [file supp_g3.114.015446_FigureS4.pdf]

Figure S4.

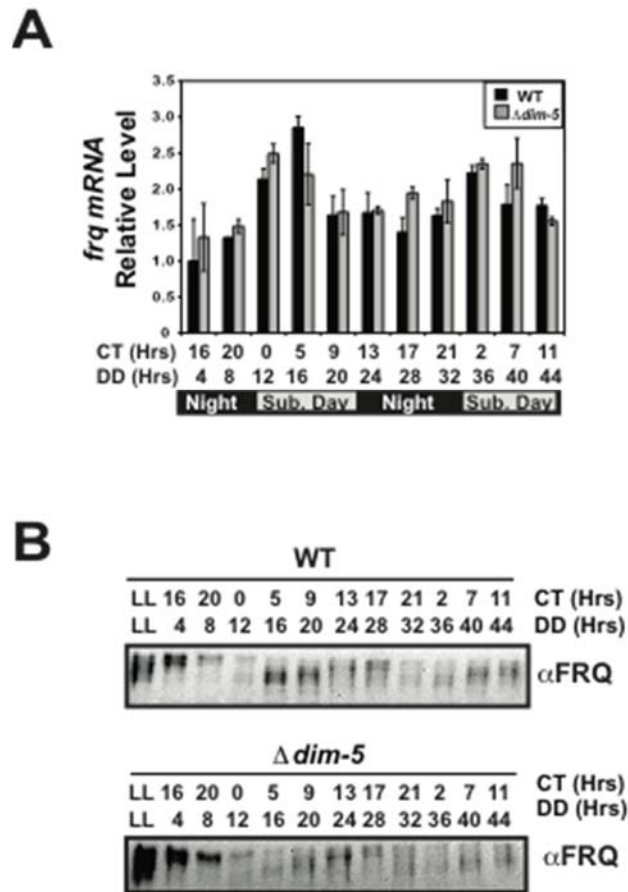

**Figure S4 Molecular Rhythms in  $\Delta dim-5$ .** (A) Molecular oscillations of the *frq* transcript were examined by RT-PCR in WT (FGSC2489) and  $\Delta dim-5$  (XB18-11) strains grown under circadian conditions. (B) Oscillations in FRQ were monitored by Western blot using an antibody specific to FRQ. The time in the dark (DD) and corresponding circadian time (CT) is indicated. Samples labeled LL indicates the strains were grown in constant light for 48 hrs.
