# Supplementary material for: The Histone H3 Lysine 9 Methyltransferase DIM-5 Modifies Chromatin at frequency and Represses Light-Activated Gene Expression
Source: PubMed Central journal article supplement (PMC4291474; doi:10.1534/g3.114.015446), 2014-11-25
Supplement: supp_g3.114.015446_FigureS6.pdf [file supp_g3.114.015446_FigureS6.pdf]

Figure S6.

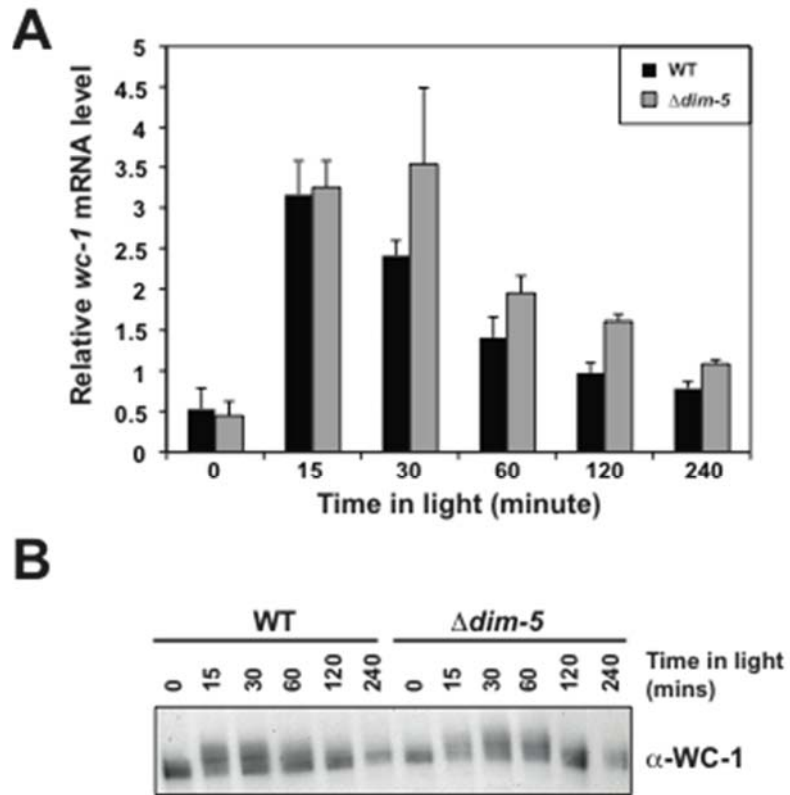

**Figure S6 DIM-5 is not required for *wc-1* expression.** (A) WT (FGSC2489) and  $\Delta dim-5$  (XB18-11) strains were grown in the dark then transferred to saturating light and harvested at the indicated time. RNA was extracted and transcript abundance was measured by RT-PCR with oligonucleotides specific for *wc-1*. (B) Total soluble protein was extracted from the samples in (A) then blotted for WC-1.
