# Supplementary material for: The Histone H3 Lysine 9 Methyltransferase DIM-5 Modifies Chromatin at frequency and Represses Light-Activated Gene Expression
Source: PubMed Central journal article supplement (PMC4291474; doi:10.1534/g3.114.015446), 2014-11-25
Supplement: supp_g3.114.015446_TableS1.pdf [file supp_g3.114.015446_TableS1.pdf]

**Table S1**

| Strain Table |                                     |                               |
|--------------|-------------------------------------|-------------------------------|
| Strain       | Genotype                            | Source                        |
| FGSC2489     | OR74, A (WT)                        | FGSC                          |
| FGSC11124    | <i>wc-2::hph, a</i>                 | FGSC                          |
| FGSC15885    | <i>[dim-5::hph, a]</i>              | FGSC                          |
| XB18-4       | <i>dim-5::hph</i>                   | This Study                    |
| XB18-5       | <i>dim-5::hph</i>                   | This Study                    |
| XB18-11      | <i>dim-5::hph</i>                   | This Study                    |
| XB18-13      | <i>dim-5::hph</i>                   | This Study                    |
| 90-2         | <i>mus51::bar, a</i>                | Colot <i>et al.</i> , 2006    |
| T101         | <i>[dim-2::nat1; mus51::bar, a]</i> | This Study                    |
| XB100-9      | <i>chd-1::hph, A</i>                | This study                    |
| XB104-2      | <i>dim-2::nat1; chd-1::hph</i>      | This Study                    |
| XB131-6      | <i>chd-1::hph, a</i>                | Belden <i>et al.</i> , 2011   |
| XB136-6      | <i>ras-1<sup>bd</sup>, A</i>        | Raduwan <i>et al.</i> , 2013  |
| XB142-8      | <i>dim-5::hph, A</i>                | This Study                    |
| XL94-10      | <i>frq-luc::bar, a</i>              | Larrondo <i>et al.</i> , 2012 |
| XB151-2      | <i>dim-5::hph; frq-luc::bar</i>     | This Study                    |
| XB230-9      | <i>dim-5::hph; chd-1::hph</i>       | This Study                    |
| XB230-12     | <i>dim-5::hph; chd-1::hph</i>       | This Study                    |

\* FGSC denotes Fungal Genetics Stock Center
